# Supplementary material for: Cerebellar climbing fibers impact experience-dependent plasticity in the mouse primary somatosensory cortex
Source: eLife. 2025 Dec 22;14:RP109183. doi: 10.7554/eLife.109183 (PMC12721708; doi:10.7554/eLife.109183)
Supplement: Figure 1—figure supplement 1—source data 1. [file elife-109183-fig1-figsupp1-data1.xlsx]

## Sheet: Supplementary source data
panel		mean	median	error	n cells	N mice	test	P value	Result	measurement (units)	cell type
G (l)	3x15	0.3455	N/A	0.0198	102	1	N/A	N/A	N/A	Amplitude (∆F/F)	PC
	2x20	0.3213		0.0177
	1x50	0.554		0.023
	(3x15)*2	0.3616		0.0171
G (r)	3x15	3.5376	N/A	0.2585	102	1	N/A	N/A	N/A	AUC ((∆F*t)/F)	PC
	2x20	3.8521		0.2483
	1x50	5.1302		0.3019
	(3x15)*2	4.3732		0.261
I (t)	Spontaneous	0.3768	0.3777	0.0078	131	2	Paired t-test	0.785	n.s.	Amplitude (∆F/F)	PC
	Evoked	0.3831	0.3184	0.0245
I (b)	Spontaneous	308.355	290.51	10.3084	131	2	Wilcoxon	0.0875	n.s.	Latency to peak (ms)	PC
	Evoked	332.761	258.231	20.5672
