# Supplementary material for: Cerebellar climbing fibers impact experience-dependent plasticity in the mouse primary somatosensory cortex
Source: eLife. 2025 Dec 22;14:RP109183. doi: 10.7554/eLife.109183 (PMC12721708; doi:10.7554/eLife.109183)
Supplement: Figure 1—figure supplement 2—source data 1. [file elife-109183-fig1-figsupp2-data1.xlsx]

## Sheet: Supplementary source data
panel		mean	median	error	%	n cells	N mice	test	P value	result	measurement (units)	cell type
C	Persistent (RWS)	N/A	N/A	N/A	87.234	329†	12	Chi-squared	0.0103	*	percent total cells (%)	PN
	Recruited (RWS)				6.99088
	Suppressed (RWS)				4.25532
	Unresponsive (RWS)				1.51976
	Persistent (RWS+CF)				89.4472	597†	11
	Recruited (RWS+CF)				8.71022
	Suppressed (RWS+CF)				1.50754
	Unresponsive (RWS+CF)				0.335008
D	Pre (RWS)	1.0374	0.4502	0.1950	N/A	329†	12	Wilcoxon	<0.001	***	AUC ((∆F*t)/F	PN
	Post (RWS)	1.3728	0.5007	0.1998
	Pre (RWS+CF)	1.1012	0.4755	0.1203		597†	11	Wilcoxon	0.9575	n.s.
	Post (RWS+CF)	0.9152	0.5405	0.0697
E	Pre (RWS)	1.4409	0.7726	0.116	N/A	616†	12	Wilcoxon	<0.001	***	AUC ((∆F*t)/F	IN
	Post (RWS)	0.9525	0.4952	0.0832
	Pre (RWS+CF)	1.4741	0.4905	0.1679		590†	11	Wilcoxon	<0.001	***
	Post (RWS+CF)	1.5336	0.643	0.1391
F	Pre (RWS)	1.4276	1.0298	0.1611	N/A	41†	3	Wilcoxon	0.0048	**	AUC ((∆F*t)/F	SST
	Post (RWS)	1.1308	0.9495	0.1378
	Pre (RWS+CF)	1.1075	0.6072	0.294		31†	3	Wilcoxon	0.7539	n.s.
	Post (RWS+CF)	1.0747	0.5804	0.1862
G	Pre (RWS)	0.6099	0.3682	0.0767	N/A	83†	5	Wilcoxon	0.0359	*	AUC ((∆F*t)/F	PV
	Post (RWS)	0.5004	0.3811	0.0651
	Pre (RWS+CF)	0.5372	0.3252	0.0779		113†	5	Wilcoxon	0.5456	n.s.
	Post (RWS+CF)	0.5028	0.3527	0.0580
† indicates whether statistics performed across cells or mice
