# Supplementary material for: Cerebellar climbing fibers impact experience-dependent plasticity in the mouse primary somatosensory cortex
Source: eLife. 2025 Dec 22;14:RP109183. doi: 10.7554/eLife.109183 (PMC12721708; doi:10.7554/eLife.109183)
Supplement: Figure 1—figure supplement 3—source data 1. [file elife-109183-fig1-figsupp3-data1.xlsx]

## Sheet: Supplementary source data
panel		mean	median	error	n cells	N mice	test	P value	result	measurement (units)	cell type
B	PN	0.0078	-0.0019	0.0023	1147	24	N/A	N/A	N/A	xCorr (r)	PN
	IN	0.0332	0.0123	0.0023	1620	35				xCorr (r)	IN
	PV	-0.00014739	-0.0002719	0.0045	221	13				xCorr (r)	PV
	SST	0.041	0.0354	0.0099	91	8				xCorr (r)	SST
	VIP	0.0909	0.0836	0.0078	173	11				xCorr (r)	VIP
D (top l)	Rest	29.61	N/A	9.7967	N/A	12†	Chi-squared	0.010712	*	percent total trials (%)	N/A
	Active	69.84		9.9334
	Stop	0.55		0.2902
D (bottom l)	Rest	24.35		9.5786
	Active	75.29		9.6393
	Stop	0.36		0.2324
D (top r)	Rest	33.46		12.1959		11†	Chi-squared	<0.001	***
	Active	66.54		12.1959
	Stop	0		0
D (bottom r)	Rest	42.45		13.1339
	Active	57.32		13.1921
	Stop	0.24		0.1441
H	Pre (RWS)	4.0059	2.1655	0.7509	124†	12	Wilcoxon	0.0147	*	AUC ((∆F*t)/F)	PN
	Post (RWS)	5.7207	2.2396	1.5931
	Pre (RWS+CF)	2.677	1.7382	0.1927	388†	11	Wilcoxon	0.5104	n.s.
	Post (RWS+CF)	2.4344	1.7958	0.1195
I	Pre (RWS)	3.3914	2.3096	0.2246	212†	12	Wilcoxon	0.0033	**	AUC ((∆F*t)/F)	IN
	Post (RWS)	2.965	2.0138	0.2076
	Pre (RWS+CF)	3.3041	2.2275	0.2025	296†	11	Wilcoxon	<0.001	***
	Post (RWS+CF)	3.5204	2.2994	0.1901
† indicates whether statistics performed across cells or mice
