# Supplementary material for: Cerebellar climbing fibers impact experience-dependent plasticity in the mouse primary somatosensory cortex
Source: eLife. 2025 Dec 22;14:RP109183. doi: 10.7554/eLife.109183 (PMC12721708; doi:10.7554/eLife.109183)
Supplement: Figure 1—figure supplement 4—source data 1. [file elife-109183-fig1-figsupp4-data1.xlsx]

## Sheet: Supplementary source data
panel		mean	error	N mice	test	P value	result	measurement (units)
C	RWS (Pre)	1	0	4	one-sample t-test	0.0471	*	Whisker responsive area
	RWS (Post)	3.6978	0.8273
	RWS+CF (Pre)	1	0	4		0.1138	n.s.
	RWS+CF (Post)	0.5195	0.2171
	control (Pre)	1	0	4		0.0649	n.s.
	control (Post)	1.5067	0.1176
