# Supplementary material for: Cerebellar climbing fibers impact experience-dependent plasticity in the mouse primary somatosensory cortex
Source: eLife. 2025 Dec 22;14:RP109183. doi: 10.7554/eLife.109183 (PMC12721708; doi:10.7554/eLife.109183)
Supplement: Figure 1—source data 1. [file elife-109183-fig1-data1.xlsx]

## Sheet: Figure 1-source data 1
panel		mean	median	error	n cells	N mice	test	P value	result	measurement (units)	cell type
1.C		0.554	0.5004	0.023	102	1	N/A	N/A	N/A	Amplitude (∆F/F)	PC
1.G	Pre (RWS)	3.9581	2.3941	0.3824	287†	12	Wilcoxon	0.0010	**	AUC ((∆F*t)/F)	PN
	Post (RWS)	5.246	2.4812	0.6725
	Pre (RWS+CF)	3.2676	1.9988	0.1811	534†	11	Wilcoxon	0.1126	n.s.
	Post (RWS+CF)	2.6892	2.0035	0.1049
1.H	-40 min (RWS)	4.65488	N/A	0.526062	144†	10	Two-way ANOVA (Group comparison)	<0.001	***	AUC ((∆F*t)/F)	PN
	-30 min (RWS)	3.91113		0.408292	174†	11
	-20 min (RWS)	3.65761		0.363853	172†	11
	-10 min (RWS)	3.91723		0.491149	213†	12
	0 min (RWS)‡	4.19536		0.738751	100†	7
	10 min (RWS)‡	5.77819		0.812687	212†	12
	20 min (RWS)‡	6.48013		1.70586	217†	12
	30 min (RWS)‡	5.91206		0.759132	155†	10
	40 min (RWS)‡	5.64781		0.882772	157†	10
	50 min (RWS)‡	5.16045		0.608532	117†	9
	60 min (RWS)‡	5.02273		0.750312	54†	4
	- 40 min (RWS+CF)	3.32904		0.298053	351†	10
	-30 min (RWS+CF)	3.60127		0.31308	317†	10
	- 20 min (RWS+CF)	3.69046		0.273899	364†	10
	-10 min (RWS+CF)	3.05876		0.226929	394†	11
	0 min (RWS+CF)‡	3.87257		0.422959	204†	9
	10 min (RWS+CF)‡	2.37707		0.106337	479†	11
	20 min (RWS+CF)‡	2.61932		0.125574	511†	11
	30 min (RWS+CF)‡	2.74055		0.14353	483†	10
	40 min (RWS+CF)‡	2.32432		0.106748	477†	10
	50 min (RWS+CF)‡	2.49962		0.129733	362†	6
	60 min (RWS+CF)‡	2.80165		0.233047	352†	4
1.I	Pre (RWS)	1	N/A	0	287	12†	One-sample t-test	0.0104	*	AUC ((∆F*t)/F)	PN
	Post (RWS)	1.2629		0.0853
	Pre (RWS+CF)	1		0	534	11†	One-sample t-test	0.003	**
	Post (RWS+CF)	0.7723		0.0584
1.J	Pre (RWS)	3.8936	2.7519	0.1701	570†	12	Wilcoxon	<0.001	***	AUC ((∆F*t)/F)	IN
	Post (RWS)	3.0852	2.2592	0.1194
	Pre (RWS+CF)	3.5683	2.3499	0.2021	516†	11	Wilcoxon	<0.001	***
	Post (RWS+CF)	3.8983	2.5878	0.1797
1.K	-40 min (RWS)	4.70089	N/A	0.286001	342†	10	Two-way ANOVA (Group comparison)	0.0127	*	AUC ((∆F*t)/F)	IN
	-30 min (RWS)	3.69953		0.222066	380†	11
	-20 min (RWS)	4.15268		0.266012	324†	11
	-10 min (RWS)	3.83042		0.210047	446†	12
	0 min (RWS)‡	4.50767		0.389202	207†	7
	10 min (RWS)‡	3.47265		0.18088	438†	12
	20 min (RWS)‡	3.31423		0.174403	434†	12
	30 min (RWS)‡	3.47938		0.18317	311†	10
	40 min (RWS)‡	3.66121		0.190136	335†	9
	50 min (RWS)‡	3.24975		0.224626	239†	9
	60 min (RWS)‡	3.16086		0.232746	147†	4
	- 40 min (RWS+CF)	3.93255		0.31366	320†	10
	-30 min (RWS+CF)	4.4692		0.395952	283†	11
	- 20 min (RWS+CF)	5.02758		0.341741	344†	10
	-10 min (RWS+CF)	3.95778		0.278027	376†	11
	0 min (RWS+CF)‡	4.11703		0.404278	219†	10
	10 min (RWS+CF)‡	3.7648		0.212052	444†	11
	20 min (RWS+CF)‡	3.87636		0.223359	479†	11
	30 min (RWS+CF)‡	3.90208		0.223745	423†	10
	40 min (RWS+CF)‡	3.37561		0.195289	405†	10
	50 min (RWS+CF)‡	3.8697		0.261874	314†	6
	60 min (RWS+CF)‡	4.25666		0.268756	273†	4
1.L	Pre (RWS)	1	N/A	0	570	12†	One-sample t-test	<0.001	***	AUC ((∆F*t)/F)	IN
	Post (RWS)	0.7983		0.0252
	Pre (RWS+CF)	1		0	516	11†	One-sample t-test	0.2233	n.s.
	Post (RWS+CF)	1.1321		0.1018
† indicates whether statistics performed across cells or mice
‡ time points included in ANOVA
