# Supplementary material for: Cerebellar climbing fibers impact experience-dependent plasticity in the mouse primary somatosensory cortex
Source: eLife. 2025 Dec 22;14:RP109183. doi: 10.7554/eLife.109183 (PMC12721708; doi:10.7554/eLife.109183)
Supplement: Figure 2—source data 1. [file elife-109183-fig2-data1.xlsx]

## Sheet: Figure 2-source data 1
panel		mean	median	error	n cells	N mice	test	P value	result	measurement (units)	cell type
2.B (c)	W (0-700ms)‡	4.3498	2.566	0.145	1894†	53	Wilcoxon	<0.001	***	AUC ((∆F*t)/F)	PN
	W+CF (0-700ms)‡	3.6114	2.4523	0.1128
	W (650-850ms)	1.1408	0.5341	0.0528			Wilcoxon	<0.001	***
	W+CF (650-850ms)	0.9488	0.5021	0.0454
2.C (r)	W	1	N/A	0	1894	53†	One-sample Wilcoxon	0.0221	*	AUC ((∆F*t)/F)	PN
	W+CF	0.934		0.0466
2.C (c)	W (0-700ms)‡	4.8425	3.2079	0.1636	2014†	53	Wilcoxon	<0.001	***	AUC ((∆F*t)/F)	IN
	W+CF (0-700ms)‡	4.9645	3.2772	0.1694
	W (650-850ms)	1.4138	1.4779	0.0533			Wilcoxon	0.0533	n.s.
	W+CF (650-850ms)	0.7817	0.7714	0.0574
2.C (r)	W	1	N/A	0	2014	53†	One-sample t-test	0.0409	*	AUC ((∆F*t)/F)	IN
	W+CF	1.0811		0.0387
2.G (c)	W (0-700ms)	2.883	2.529	0.1128	129†	7	Wilcoxon	0.8665	n.s.	AUC ((∆F*t)/F)	VIP
	W+CF (0-700ms)	2.9589	2.5207	0.1438
	W (650-850ms)‡	1.0888	0.9519	0.0545			Wilcoxon	0.0255	*
	W+CF (650-850ms)‡	1.0294	0.8138	0.0713
2.G (r)	W	1	N/A	0	129	7†	One-sample t-test	0.4113	n.s.	AUC ((∆F*t)/F)	VIP
	W+CF	1.047		0.0533
2.H (c)	W (0-700ms)‡	2.9453	2.3916	0.18	102†	12	Wilcoxon	0.001	**	AUC ((∆F*t)/F)	SST
	W+CF (0-700ms)‡	3.2532	2.7647	0.2152
	W (650-850ms)	1.028	0.8577	0.0871			Wilcoxon	0.0935	n.s.
	W+CF (650-850ms)	1.1096	0.8546	0.1002
2.H (r)	W	1	N/A	0	102	12†	One-sample t-test	0.0035	**	AUC ((∆F*t)/F)	SST
	W+CF	1.1582		0.0427
2.I (c)	W (0-700ms)‡	2.4758	2.269	0.107	177†	18	Wilcoxon	0.0032	**	AUC ((∆F*t)/F)	PV
	W+CF (0-700ms)‡	2.6768	2.369	0.1092
	W (650-850ms)	0.5549	0.4723	0.0343			Wilcoxon	0.042	*
	W+CF (650-850ms)	0.6169	0.4925	0.0371
2.I (r)	W	1	N/A	0	177	18†	One-sample t-test	0.0127	*	AUC ((∆F*t)/F)	PV
	W+CF	1.1122		0.0403
† indicates whether statistics performed across cells or mice
‡ indicates data visualized in Figure 2
