# Supplementary material for: Cerebellar climbing fibers impact experience-dependent plasticity in the mouse primary somatosensory cortex
Source: eLife. 2025 Dec 22;14:RP109183. doi: 10.7554/eLife.109183 (PMC12721708; doi:10.7554/eLife.109183)
Supplement: Figure 3—source data 1. [file elife-109183-fig3-data1.xlsx]

## Sheet: Figure 3-source data 1
panel		mean	median	error	n cells	N mice	test	P value	result	measurement (units)	cell type
3.C	Pre	5.2386	4.0088	0.8243	12	7	Wilcoxon	0.0425	*	AUC ((∆F*t)/F)	SST
	DCZ	9.2671	5.9757	2.3962
3.D (c)	Pre	5.7312	2.927	0.5212	255	4	Wilcoxon	<0.001	***	AUC ((∆F*t)/F)	PN
	Post	3.106	1.9677	0.2207
3.D (r)	Pre	0.3938	0.1934	0.0358	255	4	Wilcoxon	<0.001	***	Amplitude (∆F/F)	PN
	Post	0.2139	0.1403	0.015
3.G	Pre	8.9616	7.5298	1.1235	53	6	Wilcoxon	0.0057	**	AUC ((∆F*t)/F)	SST
	DCZ	7.5387	6.4485	0.7883
3.H (c)	Pre	7.8992	4.0365	1.0087	183	3	Wilcoxon	<0.001	***	AUC ((∆F*t)/F)	PN
	Post	9.9871	4.5967	1.2894
3.H (r)	Pre	0.5334	0.267	0.0682	183	3	Wilcoxon	<0.001	***	Amplitude (∆F/F)	PN
	Post	0.6759	0.3062	0.0872
