# Supplementary material for: Cerebellar climbing fibers impact experience-dependent plasticity in the mouse primary somatosensory cortex
Source: eLife. 2025 Dec 22;14:RP109183. doi: 10.7554/eLife.109183 (PMC12721708; doi:10.7554/eLife.109183)
Supplement: Figure 4—figure supplement 1—source data 1. [file elife-109183-fig4-figsupp1-data1.xlsx]

## Sheet: Supplementary source data
panel		mean	median	error	n cells	N mice	test	P value	result	measurement (units)
B	Pre	2.8467	2.507	0.1745	220†	3				AUC ((∆F*t)/F)
	DCZ	1.587	1.2817	0.0809	218†		Pre vs DCZ: Wilcoxon	Pre vs DCZ: <0.001	Pre vs DCZ: ***
	Post	1.7015	1.4958	0.0726	220†		DCZ vs Post: Wilcoxon	DCZ vs Post: <0.001	DCZ vs Post: ***
C	Control	0	0.0212	0.0631	218†	3	Wilcoxon	<0.001	***	Relative ∆AUC (∆((∆F*t)/F))
	Plasticity	-0.1396	-0.2199	0.0509	253†	4
E	Pre	4.2185	3.0214	0.3601	181†	3				AUC ((∆F*t)/F)
	DCZ	2.9159	2.2613	0.2104	177†		Pre vs DCZ: Wilcoxon	Pre vs DCZ: <0.001	Pre vs DCZ: ***
	Post	2.5923	2.1445	0.1419	177†		DCZ vs Post: Wilcoxon	DCZ vs Post: 0.0422	DCZ vs Post: *
F	Control	0	-0.0686	0.0655	173†	3	Wilcoxon	0.6742	n.s.	Relative ∆AUC (∆((∆F*t)/F))
	Plasticity	-2.469	-0.0227	2.9139	164†	3
H	Pre	4.3825	2.7846	0.425	181†	3				AUC ((∆F*t)/F)
	DCZ	4.3789	3.374	0.3058	185†		Pre vs DCZ: Wilcoxon	Pre vs DCZ: 0.0018	Pre vs DCZ: **
	Post	3.8364	2.8455	0.2325	180†		DCZ vs Post: Wilcoxon	DCZ vs Post: <0.001	DCZ vs Post: ***
I	Control	0	-0.2341	0.0623	175†	3	Wilcoxon	0.0928	n.s.	Relative ∆AUC (∆((∆F*t)/F))
	Plasticity	0.1359	0.0253	0.0409	181†	3
K	Pre	3.093	2.0421	0.2373	363†	4				AUC ((∆F*t)/F)
	DCZ	9.0378	6.7442	0.3663	368†		Pre vs DCZ: Wilcoxon	Pre vs DCZ: < 0.001	***
	Post	6.381	4.7294	0.2822	369†		DCZ vs Post: Wilcoxon	Pre vs DCZ: <0.001	***
L	Control	0	-0.0262	0.0189	368	4	Wilcoxon	<0.001	***	Relative ∆AUC (∆((∆F*t)/F))
	Plasticity	0.6522	0.03444	0.0633	258	3
N	Pre	2.4242	1.9103	0.2445	136†	3				AUC ((∆F*t)/F)
	DCZ	3.1922	2.6613	0.2031	137†		Pre vs DCZ: Wilcoxon	Pre vs DCZ: <0.001	Pre vs DCZ: ***
	Post	3.0724	2.5155	0.2135	137†		DCZ vs Post: Wilcoxon	DCZ vs Post:0.0902	DCZ vs Post: n.s.
O	Control	0	0.0021	0.022	145†	3	Wilcoxon	<0.001	***	Relative ∆AUC (∆((∆F*t)/F))
	Plasticity	0.1723	0.0982	0.0351	197†	4
† indicates whether statistics performed across cells or mice
