# Supplementary material for: Cerebellar climbing fibers impact experience-dependent plasticity in the mouse primary somatosensory cortex
Source: eLife. 2025 Dec 22;14:RP109183. doi: 10.7554/eLife.109183 (PMC12721708; doi:10.7554/eLife.109183)
Supplement: Figure 4—source data 1. [file elife-109183-fig4-data1.xlsx]

## Sheet: Figure 4-source data 1
panel		mean	median	error	n cells	N mice	test	P value	result	measurement (units)	cell type
4.C	Pre	1.1339	0.8779	0.3452	10	3	Paired t-test	0.0272	*	AUC ((∆F*t)/F)	VIP
	DCZ	0.2521	0.2239	0.04
4.D (c)	Pre	2.6299	1.8696	0.2739	189	3	Wilcoxon	<0.001	***	AUC ((∆F*t)/F)	PN
	Post	1.4749	1.2773	0.0768
4.D (r)	Pre	0.179	0.1242	0.02	189	3	Wilcoxon	<0.001	***	Amplitude (∆F/F)	PN
	Post	0.1021	0.0849	0.0055
4.G	Pre	1.3677	0.2754	0.8043	14	3	Wilcoxon	0.0494	*	AUC ((∆F*t)/F)	VIP
	DCZ	1.9361	0.4533	1.0391
4.H (c)	Pre	2.53	1.9726	0.1644	202	4	Wilcoxon	<0.001	***	AUC ((∆F*t)/F)	PN
	Post	3.2011	2.2506	0.2818
4.H (r)	Pre	0.1813	0.1324	0.0142	202	4	Wilcoxon	<0.001	***	Amplitude (∆F/F)	PN
	Post	0.2309	0.1529	0.0226
