# Supplementary material for: Cerebellar climbing fibers impact experience-dependent plasticity in the mouse primary somatosensory cortex
Source: eLife. 2025 Dec 22;14:RP109183. doi: 10.7554/eLife.109183 (PMC12721708; doi:10.7554/eLife.109183)
Supplement: Figure 5—source data 1. [file elife-109183-fig5-data1.xlsx]

## Sheet: Figure 5-source data 1
panel		mean	median	error	n cells	N mice	test	P value	result	measurement (units)	cell type
5.C (c)	Pre	2.0677	1.4505	0.2728	27	3	Wilcoxon	0.0174	*	AUC ((∆F*t)/F)	IN
	Post	2.5314	2.1002	0.2536
5.C (r)	Pre	0.1400	0.1096	0.0181	27	3	Wilcoxon	0.0198	*	Amplitude (∆F/F)	IN
	Post	0.1740	0.1366	0.0181
5.F (c)	Pre	3.7801	2.5438	0.3629	105	4	Wilcoxon	<0.001	***	AUC ((∆F*t)/F)	IN
	Post	2.9725	2.2871	0.2231
5.F (r)	Pre	0.2656	0.1778	0.0263	105	4	Wilcoxon	<0.001	***	Amplitude (∆F/F)	IN
	Post	0.2052	0.1572	0.0162
