# Supplementary material for: Cerebellar climbing fibers impact experience-dependent plasticity in the mouse primary somatosensory cortex
Source: eLife. 2025 Dec 22;14:RP109183. doi: 10.7554/eLife.109183 (PMC12721708; doi:10.7554/eLife.109183)
Supplement: Figure 6—source data 1. [file elife-109183-fig6-data1.xlsx]

## Sheet: Figure 6-source data 1
panel		mean	median	error	n cells	N mice	test	P value	result	measurement (units)	cell type
6.F	baseline	1.2386	N/A	0.11	5	5	Welch's t-test	<0.001	***	EPSP amplitude (mV)	ZI neuron
	+TTX	0.4094		0.08103	3	3
	baseline	3.4		0.4159	5	5	Welch's t-test	0.62	n.s.	Latency (ms)
	+TTX	3.633		0.1333	3	3
6.I	W (Baseline)	5.1648	3.2461	0.778	80	3	Wilcoxon	0.0183	*	AUC ((∆F*t)/F)	PN
	W+CF (Baseline)	4.7113	3.1395	0.7239
	W (DCZ)	3.6838	2.5494	0.6804			Wilcoxon	<0.001	***
	W+CF (DCZ)	4.1972	2.7795	0.6946
